# Supplementary material for: Measuring multimorbidity in hospitalised patients using linked hospital episode data: comparison of two measures
Source: PubMed Central journal article supplement (PMC7479941; doi:10.23889/ijpds.v4i1.461), 2019-01-21
Supplement: ijpds-04-461-s001.pdf [file ijpds-04-461-s001.pdf]

**Supplementary Appendix 1. Coding definitions (ICD-10) for conditions included in Charlson and Tonelli measures**

**Charlson conditions (Quan 2005)**

| <b>Condition</b>                            | <b>ICD-10 codes</b>                                                       | <b>Description</b>                                                         | <b>Prevalence (%)</b> |
|---------------------------------------------|---------------------------------------------------------------------------|----------------------------------------------------------------------------|-----------------------|
| Chronic pulmonary disease (includes asthma) | I27.8                                                                     | Other specified pulmonary heart diseases                                   | 11.3                  |
|                                             | I27.9                                                                     | Pulmonary heart disease, unspecified                                       |                       |
|                                             | J40                                                                       | Bronchitis, not specified as acute or chronic                              |                       |
|                                             | J41                                                                       | Simple and mucopurulent chronic bronchitis                                 |                       |
|                                             | J42                                                                       | Unspecified chronic bronchitis                                             |                       |
|                                             | J43                                                                       | Emphysema                                                                  |                       |
|                                             | J44                                                                       | Other chronic obstructive pulmonary disease                                |                       |
|                                             | J45                                                                       | Asthma                                                                     |                       |
|                                             | J46                                                                       | Status asthmaticus                                                         |                       |
|                                             | J47                                                                       | Bronchiectasis                                                             |                       |
|                                             | J60                                                                       | Coalworker pneumoconiosis                                                  |                       |
|                                             | J61                                                                       | Pneumoconiosis due to asbestos and other mineral fibres                    |                       |
|                                             | J62                                                                       | Pneumoconiosis due to dust containing silica                               |                       |
|                                             | J63                                                                       | Pneumoconiosis due to other inorganic dusts                                |                       |
|                                             | J64                                                                       | Unspecified pneumoconiosis                                                 |                       |
|                                             | J65                                                                       | Pneumoconiosis associated with tuberculosis                                |                       |
|                                             | J66                                                                       | Airway disease due to specific organic dust                                |                       |
| J67                                         | Hypersensitivity pneumonitis due to organic dust                          |                                                                            |                       |
| J68.4                                       | Chronic respiratory conditions due to chemicals, gases, fumes and vapours |                                                                            |                       |
| J70.1                                       | Chronic and other pulmonary manifestations due to radiation               |                                                                            |                       |
| J70.3                                       | Chronic drug-induced interstitial lung disorders                          |                                                                            |                       |
| Diabetes without chronic complications      | E10.0                                                                     | Insulin-dependent diabetes mellitus-With coma                              | 7.5                   |
|                                             | E10.1                                                                     | Insulin-dependent diabetes mellitus-With ketoacidosis                      |                       |
|                                             | E10.6                                                                     | Insulin-dependent diabetes mellitus-With other specified complications     |                       |
|                                             | E10.8                                                                     | Insulin-dependent diabetes mellitus-With unspecified complications         |                       |
|                                             | E10.9                                                                     | Insulin-dependent diabetes mellitus-Without complications                  |                       |
|                                             | E11.0                                                                     | Non-insulin-dependent diabetes mellitus-With coma                          |                       |
|                                             | E11.1                                                                     | Non-insulin-dependent diabetes mellitus-With ketoacidosis                  |                       |
|                                             | E11.6                                                                     | Non-insulin-dependent diabetes mellitus-With other specified complications |                       |
|                                             | E11.8                                                                     | Non-insulin-dependent diabetes mellitus-With unspecified complications     |                       |
|                                             | E11.9                                                                     | Non-insulin-dependent diabetes mellitus-Without complications              |                       |
|                                             | E12.0                                                                     | Malnutrition-related diabetes mellitus-With coma                           |                       |
|                                             | E12.1                                                                     | Malnutrition-related diabetes mellitus-With ketoacidosis                   |                       |
|                                             | E12.6                                                                     | Malnutrition-related diabetes mellitus-With other specified complications  |                       |
|                                             | E12.8                                                                     | Malnutrition-related diabetes mellitus-With unspecified complications      |                       |

| Condition                                                                          | ICD-10 codes                                                                                                                                                                   | Description                                                                                                                                                                                                                                                                                                                                                                                                                                                                                                                                                                                                                                                                                                                                                                                                                                                                                                                                                                                                                                                                                                                                                                                                                                                                                                                                                                                                 | Prevalence (%) |
|------------------------------------------------------------------------------------|--------------------------------------------------------------------------------------------------------------------------------------------------------------------------------|-------------------------------------------------------------------------------------------------------------------------------------------------------------------------------------------------------------------------------------------------------------------------------------------------------------------------------------------------------------------------------------------------------------------------------------------------------------------------------------------------------------------------------------------------------------------------------------------------------------------------------------------------------------------------------------------------------------------------------------------------------------------------------------------------------------------------------------------------------------------------------------------------------------------------------------------------------------------------------------------------------------------------------------------------------------------------------------------------------------------------------------------------------------------------------------------------------------------------------------------------------------------------------------------------------------------------------------------------------------------------------------------------------------|----------------|
|                                                                                    | E12.9                                                                                                                                                                          | Malnutrition-related diabetes mellitus-Without complications                                                                                                                                                                                                                                                                                                                                                                                                                                                                                                                                                                                                                                                                                                                                                                                                                                                                                                                                                                                                                                                                                                                                                                                                                                                                                                                                                |                |
|                                                                                    | E13.0                                                                                                                                                                          | Other specified diabetes mellitus-With coma                                                                                                                                                                                                                                                                                                                                                                                                                                                                                                                                                                                                                                                                                                                                                                                                                                                                                                                                                                                                                                                                                                                                                                                                                                                                                                                                                                 |                |
|                                                                                    | E13.1                                                                                                                                                                          | Other specified diabetes mellitus-With ketoacidosis                                                                                                                                                                                                                                                                                                                                                                                                                                                                                                                                                                                                                                                                                                                                                                                                                                                                                                                                                                                                                                                                                                                                                                                                                                                                                                                                                         |                |
|                                                                                    | E13.6                                                                                                                                                                          | Other specified diabetes mellitus-With other specified complications                                                                                                                                                                                                                                                                                                                                                                                                                                                                                                                                                                                                                                                                                                                                                                                                                                                                                                                                                                                                                                                                                                                                                                                                                                                                                                                                        |                |
|                                                                                    | E13.8                                                                                                                                                                          | Other specified diabetes mellitus-With unspecified complications                                                                                                                                                                                                                                                                                                                                                                                                                                                                                                                                                                                                                                                                                                                                                                                                                                                                                                                                                                                                                                                                                                                                                                                                                                                                                                                                            |                |
|                                                                                    | E13.9                                                                                                                                                                          | Other specified diabetes mellitus-Without complications                                                                                                                                                                                                                                                                                                                                                                                                                                                                                                                                                                                                                                                                                                                                                                                                                                                                                                                                                                                                                                                                                                                                                                                                                                                                                                                                                     |                |
|                                                                                    | E14.0                                                                                                                                                                          | Unspecified diabetes mellitus-With coma                                                                                                                                                                                                                                                                                                                                                                                                                                                                                                                                                                                                                                                                                                                                                                                                                                                                                                                                                                                                                                                                                                                                                                                                                                                                                                                                                                     |                |
|                                                                                    | E14.1                                                                                                                                                                          | Unspecified diabetes mellitus-With ketoacidosis                                                                                                                                                                                                                                                                                                                                                                                                                                                                                                                                                                                                                                                                                                                                                                                                                                                                                                                                                                                                                                                                                                                                                                                                                                                                                                                                                             |                |
|                                                                                    | E14.6                                                                                                                                                                          | Unspecified diabetes mellitus-With other specified complications                                                                                                                                                                                                                                                                                                                                                                                                                                                                                                                                                                                                                                                                                                                                                                                                                                                                                                                                                                                                                                                                                                                                                                                                                                                                                                                                            |                |
|                                                                                    | E14.8                                                                                                                                                                          | Unspecified diabetes mellitus-With unspecified complications                                                                                                                                                                                                                                                                                                                                                                                                                                                                                                                                                                                                                                                                                                                                                                                                                                                                                                                                                                                                                                                                                                                                                                                                                                                                                                                                                |                |
|                                                                                    | E14.9                                                                                                                                                                          | Unspecified diabetes mellitus-Without complications                                                                                                                                                                                                                                                                                                                                                                                                                                                                                                                                                                                                                                                                                                                                                                                                                                                                                                                                                                                                                                                                                                                                                                                                                                                                                                                                                         |                |
| Any malignancy, including lymphoma and leukemia, except malignant neoplasm of skin | C00–<br>C26<br>C30<br>C31<br>C32<br>C33<br>C34<br>C37<br>C38<br>C39<br>C40<br>C41<br>C43<br>C45–<br>C58<br>C60–<br>C76<br>C81<br>C82<br>C83<br>C84<br>C85<br>C88<br>C90<br>C91 | Malignant neoplasms of lip, oral cavity and pharynx<br>Malignant neoplasms of digestive organs<br>Malignant neoplasm of nasal cavity and middle ear<br>Malignant neoplasm of accessory sinuses<br>Malignant neoplasm of larynx<br>Malignant neoplasm of trachea<br>Malignant neoplasm of bronchus and lung<br>Malignant neoplasm of thymus<br>Malignant neoplasm of heart, mediastinum and pleura<br>Malignant neoplasm of other and ill-defined sites in the respiratory system and intrathoracic organs<br>Malignant neoplasm of bone and articular cartilage of limbs<br>Malignant neoplasm of bone and articular cartilage of other and unspecified sites<br>Malignant melanoma of skin<br>Malignant neoplasms of mesothelial and soft tissue<br>Malignant neoplasm of breast<br>Malignant neoplasms of female genital organs<br>Malignant neoplasms of male genital organs<br>Malignant neoplasms of urinary tract<br>Malignant neoplasms of eye, brain and other parts of central nervous system<br>Malignant neoplasms of thyroid and other endocrine glands<br>Malignant neoplasm of other and ill-defined sites<br>Hodgkin lymphoma<br>Follicular lymphoma<br>Non-follicular lymphoma<br>Mature T/NK-cell lymphomas<br>Other and unspecified types of non-Hodgkin lymphoma<br>Malignant immunoproliferative diseases<br>Multiple myeloma and malignant plasma cell neoplasms<br>Lymphoid leukaemia | 6.9            |

| Condition                | ICD-10 codes                                                                                                                                                                                   | Description                                                                                                                                                                                                                                                                                                                                                                                                                                                                                                                                                                                                                                                                                                                                                                                                                                                                                                                                                                                                                                                                                                                                                                                                                                          | Prevalence (%) |
|--------------------------|------------------------------------------------------------------------------------------------------------------------------------------------------------------------------------------------|------------------------------------------------------------------------------------------------------------------------------------------------------------------------------------------------------------------------------------------------------------------------------------------------------------------------------------------------------------------------------------------------------------------------------------------------------------------------------------------------------------------------------------------------------------------------------------------------------------------------------------------------------------------------------------------------------------------------------------------------------------------------------------------------------------------------------------------------------------------------------------------------------------------------------------------------------------------------------------------------------------------------------------------------------------------------------------------------------------------------------------------------------------------------------------------------------------------------------------------------------|----------------|
|                          | C92<br>C93<br>C94<br>C95                                                                                                                                                                       | Myeloid leukaemia<br>Monocytic leukaemia<br>Other leukaemias of specified cell type<br>Leukaemia of unspecified cell type                                                                                                                                                                                                                                                                                                                                                                                                                                                                                                                                                                                                                                                                                                                                                                                                                                                                                                                                                                                                                                                                                                                            |                |
|                          | C96<br>C97                                                                                                                                                                                     | Other and unspecified malignant neoplasms of lymphoid, haematopoietic and related tissue<br>Malignant neoplasms of independent (primary) multiple sites                                                                                                                                                                                                                                                                                                                                                                                                                                                                                                                                                                                                                                                                                                                                                                                                                                                                                                                                                                                                                                                                                              |                |
| Renal disease            | I12.0<br>I13.1<br>N03.2<br>N03.3<br>N03.4<br>N03.5<br>N03.6<br>N03.7<br>N05.2<br>N05.3<br>N05.4<br>N05.5<br>N05.6<br>N05.7<br>N18<br>N19<br>N25.0<br>Z49.0<br>Z49.1<br>Z49.2<br>Z94.0<br>Z99.2 | Hypertensive renal disease with renal failure<br>Hypertensive heart and renal disease with renal failure<br>Chronic nephritic syndrome-Diffuse membranous glomerulonephritis<br>Chronic nephritic syndrome-Diffuse mesangial proliferative glomerulonephritis<br>Chronic nephritic syndrome-Diffuse endocapillary proliferative glomerulonephritis<br>Chronic nephritic syndrome-Diffuse mesangiocapillary glomerulonephritis<br>Chronic nephritic syndrome-Dense deposit disease<br>Chronic nephritic syndrome-Diffuse crescentic glomerulonephritis<br>Unspecified nephritic syndrome-Diffuse membranous glomerulonephritis<br>Unspecified nephritic syndrome-Diffuse mesangial proliferative glomerulonephritis<br>Unspecified nephritic syndrome-Diffuse endocapillary proliferative glomerulonephritis<br>Unspecified nephritic syndrome-Diffuse mesangiocapillary glomerulonephritis<br>Unspecified nephritic syndrome-Dense deposit disease<br>Unspecified nephritic syndrome-Diffuse crescentic glomerulonephritis<br>Chronic kidney disease<br>Unspecified kidney failure<br>Renal osteodystrophy<br>Preparatory care for dialysis<br>Extracorporeal dialysis<br>Other dialysis<br>Kidney transplant status<br>Dependence on renal dialysis | 6.1            |
| Myocardial infarction    | I21<br>I22<br>I25.2                                                                                                                                                                            | Acute myocardial infarction<br>Subsequent myocardial infarction<br>Old myocardial infarction                                                                                                                                                                                                                                                                                                                                                                                                                                                                                                                                                                                                                                                                                                                                                                                                                                                                                                                                                                                                                                                                                                                                                         | 5.6            |
| Congestive heart failure | I09.9<br>I11.0<br>I13.0<br>I13.2<br>I25.5                                                                                                                                                      | Rheumatic heart disease, unspecified<br>Hypertensive heart disease with (congestive) heart failure<br>Hypertensive heart and renal disease with (congestive) heart failure<br>Hypertensive heart and renal disease with both (congestive) heart failure and renal failure<br>Ischaemic cardiomyopathy                                                                                                                                                                                                                                                                                                                                                                                                                                                                                                                                                                                                                                                                                                                                                                                                                                                                                                                                                | 3.8            |

| Condition                   | ICD-10 codes                                                                                                  | Description                                                                                                                                                                                                                                                                                                                                                                                                                                                                                                                                                                                                                                                          | Prevalence (%) |
|-----------------------------|---------------------------------------------------------------------------------------------------------------|----------------------------------------------------------------------------------------------------------------------------------------------------------------------------------------------------------------------------------------------------------------------------------------------------------------------------------------------------------------------------------------------------------------------------------------------------------------------------------------------------------------------------------------------------------------------------------------------------------------------------------------------------------------------|----------------|
|                             | I42.0<br>I42.5<br>I42.6<br>I42.7                                                                              | Dilated cardiomyopathy<br>Other restrictive cardiomyopathy<br>Alcoholic cardiomyopathy<br>Cardiomyopathy due to drugs and other external agents                                                                                                                                                                                                                                                                                                                                                                                                                                                                                                                      |                |
|                             | I42.8<br>I42.9<br>I43<br>I50<br>P29.0                                                                         | Other cardiomyopathies<br>Cardiomyopathy, unspecified<br>Cardiomyopathy in diseases classified elsewhere<br>Heart failure<br>Neonatal cardiac failure                                                                                                                                                                                                                                                                                                                                                                                                                                                                                                                |                |
| Peripheral vascular disease | I70<br>I71<br>I73.1<br>I73.8<br>I73.9<br>I77.1<br>I79.0<br>I79.2<br>K55.1<br>K55.8<br>K55.9<br>Z95.8<br>Z95.9 | Atherosclerosis<br>Aortic aneurysm and dissection<br>Thromboangiitis obliterans [Buerger]<br>Other specified peripheral vascular diseases<br>Peripheral vascular disease, unspecified<br>Stricture of artery<br>Aneurysm of aorta in diseases classified elsewhere<br>Peripheral angiopathy in diseases classified elsewhere<br>Chronic vascular disorders of intestine<br>Other vascular disorders of intestine<br>Vascular disorder of intestine, unspecified<br>Presence of other cardiac and vascular implants and grafts<br>Presence of cardiac and vascular implant and graft, unspecified                                                                     | 3.3            |
| Cerebrovascular disease     | G45<br>G46<br>H34.0<br>I60<br>I61<br>I62<br>I63<br>I64<br>I65<br>I66<br>I67<br>I68<br>I69                     | Transient cerebral ischaemic attacks and related syndromes<br>Vascular syndromes of brain in cerebrovascular diseases<br>Transient retinal artery occlusion<br>Subarachnoid haemorrhage<br>Intracerebral haemorrhage<br>Other nontraumatic intracranial haemorrhage<br>Cerebral infarction<br>Stroke, not specified as haemorrhage or infarction<br>Occlusion and stenosis of precerebral arteries, not resulting in cerebral infarction<br>Occlusion and stenosis of cerebral arteries, not resulting in cerebral infarction<br>Other cerebrovascular diseases<br>Cerebrovascular disorders in diseases classified elsewhere<br>Sequelae of cerebrovascular disease | 3.2            |
| Metastatic solid tumour     | C77<br>C78<br>C79<br>C80                                                                                      | Secondary and unspecified malignant neoplasm of lymph nodes<br>Secondary malignant neoplasm of respiratory and digestive organs<br>Secondary malignant neoplasm of other and unspecified sites<br>Malignant neoplasm, without specification of site                                                                                                                                                                                                                                                                                                                                                                                                                  | 1.8            |
| Dementia                    | F00<br>F01                                                                                                    | Dementia in Alzheimer disease<br>Vascular dementia                                                                                                                                                                                                                                                                                                                                                                                                                                                                                                                                                                                                                   | 1.7            |

| Condition                           | ICD-10 codes                                                                                                                                                      | Description                                                                                                                                                                                                                                                                                                                                                                                                                                                                                                                                                                                                                                                                                                                                            | Prevalence (%) |
|-------------------------------------|-------------------------------------------------------------------------------------------------------------------------------------------------------------------|--------------------------------------------------------------------------------------------------------------------------------------------------------------------------------------------------------------------------------------------------------------------------------------------------------------------------------------------------------------------------------------------------------------------------------------------------------------------------------------------------------------------------------------------------------------------------------------------------------------------------------------------------------------------------------------------------------------------------------------------------------|----------------|
|                                     | F02<br>F03<br>F05.1<br>G30<br>G31.1                                                                                                                               | Dementia in other diseases classified elsewhere<br>Unspecified dementia<br>Delirium superimposed on dementia<br>Alzheimer disease<br>Senile degeneration of brain, not elsewhere classified                                                                                                                                                                                                                                                                                                                                                                                                                                                                                                                                                            |                |
| Rheumatic disease                   | M05<br>M06<br>M31.5<br>M32<br>M33<br>M34<br>M35.1<br>M35.3<br>M36.0                                                                                               | Seropositive rheumatoid arthritis<br>Other rheumatoid arthritis<br>Giant cell arteritis with polymyalgia rheumatica<br>Systemic lupus erythematosus<br>Dermatopolymyositis<br>Systemic sclerosis<br>Other overlap syndromes<br>Polymyalgia rheumatica<br>Dermao(poly)myositis in neoplastic disease                                                                                                                                                                                                                                                                                                                                                                                                                                                    | 1.7            |
| Mild liver disease                  | B18<br>K70.0<br>K70.1<br>K70.2<br>K70.3<br>K70.9<br>K71.3<br>K71.4<br>K71.5<br>K71.7<br>K73<br>K74<br>K76.0<br>K76.2<br>K76.3<br>K76.4<br>K76.8<br>K76.9<br>Z94.4 | Chronic viral hepatitis<br>Alcoholic fatty liver<br>Alcoholic hepatitis<br>Alcoholic fibrosis and sclerosis of liver<br>Alcoholic cirrhosis of liver<br>Alcoholic liver disease, unspecified<br>Toxic liver disease with chronic persistent hepatitis<br>Toxic liver disease with chronic lobular hepatitis<br>Toxic liver disease with chronic active hepatitis<br>Toxic liver disease with fibrosis and cirrhosis of liver<br>Chronic hepatitis, not elsewhere classified<br>Fibrosis and cirrhosis of liver<br>Fatty (change of) liver, not elsewhere classified<br>Central haemorrhagic necrosis of liver<br>Infarction of liver<br>Peliosis hepatis<br>Other specified diseases of liver<br>Liver disease, unspecified<br>Liver transplant status | 1.4            |
| Peptic ulcer disease                | K25<br>K26<br>K27<br>K28                                                                                                                                          | Gastric ulcer<br>Duodenal ulcer<br>Peptic ulcer, site unspecified<br>Gastrojejunal ulcer                                                                                                                                                                                                                                                                                                                                                                                                                                                                                                                                                                                                                                                               | 0.9            |
| Diabetes with chronic complications | E10.2<br>E10.3<br>E10.4<br>E10.5<br>E10.7<br>E11.2<br>E11.3                                                                                                       | Insulin-dependent diabetes mellitus-With renal complications<br>Insulin-dependent diabetes mellitus-With ophthalmic complications<br>Insulin-dependent diabetes mellitus-With neurological complications<br>Insulin-dependent diabetes mellitus-With peripheral circulatory complications<br>Insulin-dependent diabetes mellitus-With multiple complications<br>Non-insulin-dependent diabetes mellitus-With renal complications<br>Non-insulin-dependent diabetes mellitus-With ophthalmic complications                                                                                                                                                                                                                                              | 0.9            |

| Condition                     | ICD-10 codes                                                                                                                        | Description                                                                                                                                                                                                                                                                                                                                                                                                                                                                                                                                                                                                                                                                                                                                                                                                                                                                                                                                                                                                                                                         | Prevalence (%) |
|-------------------------------|-------------------------------------------------------------------------------------------------------------------------------------|---------------------------------------------------------------------------------------------------------------------------------------------------------------------------------------------------------------------------------------------------------------------------------------------------------------------------------------------------------------------------------------------------------------------------------------------------------------------------------------------------------------------------------------------------------------------------------------------------------------------------------------------------------------------------------------------------------------------------------------------------------------------------------------------------------------------------------------------------------------------------------------------------------------------------------------------------------------------------------------------------------------------------------------------------------------------|----------------|
|                               | E11.4<br>E11.5<br>E11.7                                                                                                             | Non-insulin-dependent diabetes mellitus-With neurological complications<br>Non-insulin-dependent diabetes mellitus-With peripheral circulatory complications<br>Non-insulin-dependent diabetes mellitus-With multiple complications                                                                                                                                                                                                                                                                                                                                                                                                                                                                                                                                                                                                                                                                                                                                                                                                                                 |                |
|                               | E12.2<br>E12.3<br>E12.4<br>E12.5<br>E12.7<br>E13.2<br>E13.3<br>E13.4<br>E13.5<br>E13.7<br>E14.2<br>E14.3<br>E14.4<br>E14.5<br>E14.7 | Malnutrition-related diabetes mellitus-With renal complications<br>Malnutrition-related diabetes mellitus-With ophthalmic complications<br>Malnutrition-related diabetes mellitus-With neurological complications<br>Malnutrition-related diabetes mellitus-With peripheral circulatory complications<br>Malnutrition-related diabetes mellitus-With multiple complications<br>Other specified diabetes mellitus-With renal complications<br>Other specified diabetes mellitus-With ophthalmic complications<br>Other specified diabetes mellitus-With neurological complications<br>Other specified diabetes mellitus-With peripheral circulatory complications<br>Other specified diabetes mellitus-With multiple complications<br>Unspecified diabetes mellitus-With renal complications<br>Unspecified diabetes mellitus-With ophthalmic complications<br>Unspecified diabetes mellitus-With neurological complications<br>Unspecified diabetes mellitus-With peripheral circulatory complications<br>Unspecified diabetes mellitus-With multiple complications |                |
| Hemiplegia or paraplegia      | G04.1<br>G11.4<br>G80.1<br>G80.2<br>G81<br>G82<br>G83.0<br>G83.1<br>G83.2<br>G83.3<br>G83.4<br>G83.9                                | Tropical spastic paraplegia<br>Hereditary spastic paraplegia<br>Spastic diplegic cerebral palsy<br>Spastic hemiplegic cerebral palsy<br>Hemiplegia<br>Paraplegia and tetraplegia<br>Diplegia of upper limbs<br>Monoplegia of lower limb<br>Monoplegia of upper limb<br>Monoplegia, unspecified<br>Cauda equina syndrome<br>Paralytic syndrome, unspecified                                                                                                                                                                                                                                                                                                                                                                                                                                                                                                                                                                                                                                                                                                          | 0.7            |
| Moderate/severe liver disease | I85.0<br>I85.9<br>I86.4                                                                                                             | Oesophageal varices with bleeding<br>Oesophageal varices without bleeding<br>Gastric varices                                                                                                                                                                                                                                                                                                                                                                                                                                                                                                                                                                                                                                                                                                                                                                                                                                                                                                                                                                        | 0.6            |

| Condition | ICD-10 codes                                                         | Description                                                                                                                                                                                                                                                                                                            | Prevalence (%) |
|-----------|----------------------------------------------------------------------|------------------------------------------------------------------------------------------------------------------------------------------------------------------------------------------------------------------------------------------------------------------------------------------------------------------------|----------------|
|           | I98.2<br>K70.4<br>K71.1<br>K72.1<br>K72.9<br>K76.5<br>K76.6<br>K76.7 | Oesophageal varices without bleeding in diseases classified elsewhere<br>Alcoholic hepatic failure<br>Toxic liver disease with hepatic necrosis<br>Chronic hepatic failure<br>Hepatic failure, unspecified<br>Hepatic veno-occlusive disease<br>Portal hypertension<br>Hepatorenal syndrome                            |                |
| AIDS/HIV  | B20<br>B21<br>B22<br>B24                                             | Human immunodeficiency virus [HIV] disease resulting in infectious and parasitic diseases<br>Human immunodeficiency virus [HIV] disease resulting in malignant neoplasms<br>Human immunodeficiency virus [HIV] disease resulting in other specified diseases<br>Unspecified human immunodeficiency virus [HIV] disease | 0.0            |

**Tonelli conditions (Tonelli 2015)**

| <b>Morbidity</b>                | <b>ICD-10 codes</b>                                                                                                                                                                                                                                                                           | <b>Description</b>                                                                                                                                                                                                                                                                                                                                                                                                                                                                                                                                                                                                                                                                                                                                                                                                                                                                                                                                                                                                                                              | <b>Prevalence (%)</b> |
|---------------------------------|-----------------------------------------------------------------------------------------------------------------------------------------------------------------------------------------------------------------------------------------------------------------------------------------------|-----------------------------------------------------------------------------------------------------------------------------------------------------------------------------------------------------------------------------------------------------------------------------------------------------------------------------------------------------------------------------------------------------------------------------------------------------------------------------------------------------------------------------------------------------------------------------------------------------------------------------------------------------------------------------------------------------------------------------------------------------------------------------------------------------------------------------------------------------------------------------------------------------------------------------------------------------------------------------------------------------------------------------------------------------------------|-----------------------|
| Hypertension                    | I10<br>I11<br>I12<br>I13<br>I15                                                                                                                                                                                                                                                               | Essential (primary) hypertension<br>Hypertensive heart disease<br>Hypertensive renal disease<br>Hypertensive heart and renal disease<br>Secondary hypertension                                                                                                                                                                                                                                                                                                                                                                                                                                                                                                                                                                                                                                                                                                                                                                                                                                                                                                  | 19.0                  |
| Diabetes                        | E10<br>E11<br>E12<br>E13<br>E14                                                                                                                                                                                                                                                               | Insulin-dependent diabetes mellitus<br>Non-insulin-dependent diabetes mellitus<br>Malnutrition-related diabetes mellitus<br>Other specified diabetes mellitus<br>Unspecified diabetes mellitus                                                                                                                                                                                                                                                                                                                                                                                                                                                                                                                                                                                                                                                                                                                                                                                                                                                                  | 8.4                   |
| Chronic kidney disease          | N00-N23                                                                                                                                                                                                                                                                                       | Glomerular diseases (N00-N08)<br>Renal tubulo-interstitial diseases (N10-N16)<br>Renal failure (N17-N19)<br>Urolithiasis (N20-N23)                                                                                                                                                                                                                                                                                                                                                                                                                                                                                                                                                                                                                                                                                                                                                                                                                                                                                                                              | 8.2                   |
| Asthma                          | J45                                                                                                                                                                                                                                                                                           | Asthma                                                                                                                                                                                                                                                                                                                                                                                                                                                                                                                                                                                                                                                                                                                                                                                                                                                                                                                                                                                                                                                          | 6.7                   |
| Atrial fibrillation and flutter | I48                                                                                                                                                                                                                                                                                           | Atrial fibrillation and flutter                                                                                                                                                                                                                                                                                                                                                                                                                                                                                                                                                                                                                                                                                                                                                                                                                                                                                                                                                                                                                                 | 6.1                   |
| Chronic pain                    | F45.4<br>M08.1<br>M25.5<br>M43.2<br>M43.3<br>M43.4<br>M43.5<br>M43.6<br>M45<br>M46.1<br>M46.3<br>M46.4<br>M46.9<br>M47<br>M48.0<br>M48.1<br>M48.8<br>M48.9<br>M50.8<br>M50.9<br>M51<br>M53.1<br>M53.2<br>M53.3<br>M53.8<br>M53.9<br>M54<br>M60.8<br>M60.9<br>M63.3<br>M79.0<br>M79.1<br>M79.2 | Persistent somatoform pain disorder<br>Juvenile ankylosing spondylitis<br>Pain in joint<br>Other fusion of spine<br>Recurrent atlantoaxial subluxation with myelopathy<br>Other recurrent atlantoaxial subluxation<br>Other recurrent vertebral subluxation<br>Torticollis<br>Ankylosing spondylitis<br>Sacroiliitis, not elsewhere classified<br>Infection of intervertebral disc (pyogenic)<br>Discitis, unspecified<br>Inflammatory spondylopathy, unspecified<br>Spondylosis<br>Spinal stenosis<br>Ankylosing hyperostosis [Forestier]<br>Other specified spondylopathies<br>Spondylopathy, unspecified<br>Other cervical disc disorders<br>Cervical disc disorder, unspecified<br>Other intervertebral disc disorders<br>Cervicobrachial syndrome<br>Spinal instabilities<br>Sacrococcygeal disorders, not elsewhere classified<br>Other specified dorsopathies<br>Dorsopathy, unspecified<br>Dorsalgia<br>Other myositis<br>Myositis, unspecified<br>Myositis in sarcoidosis<br>Rheumatism, unspecified<br>Myalgia<br>Neuralgia and neuritis, unspecified | 6.1                   |



| Morbidity                                                             | ICD-10 codes                                                                                                                                       | Description                                                                                                                                                                                                                                                                                                                                                                                                                                                                                                                                                                                                                                                                                                                                                                                                                                                                                  | Prevalence (%) |
|-----------------------------------------------------------------------|----------------------------------------------------------------------------------------------------------------------------------------------------|----------------------------------------------------------------------------------------------------------------------------------------------------------------------------------------------------------------------------------------------------------------------------------------------------------------------------------------------------------------------------------------------------------------------------------------------------------------------------------------------------------------------------------------------------------------------------------------------------------------------------------------------------------------------------------------------------------------------------------------------------------------------------------------------------------------------------------------------------------------------------------------------|----------------|
|                                                                       | M79.6<br>M79.7<br>M96.1                                                                                                                            | Pain in limb<br>Fibromyalgia<br>Postlaminectomy syndrome, not elsewhere classified                                                                                                                                                                                                                                                                                                                                                                                                                                                                                                                                                                                                                                                                                                                                                                                                           |                |
| Chronic pulmonary disease (excludes asthma)                           | I27.8<br>I27.9<br>J40<br>J41<br>J42<br>J43<br>J44<br>J46<br>J47<br>J60<br>J61<br>J62<br>J63<br>J64<br>J65<br>J66<br>J67<br>J68.4<br>J70.1<br>J70.3 | Other specified pulmonary heart diseases<br>Pulmonary heart disease, unspecified<br>Bronchitis, not specified as acute or chronic<br>Simple and mucopurulent chronic bronchitis<br>Unspecified chronic bronchitis<br>Emphysema<br>Other chronic obstructive pulmonary disease<br>Status asthmaticus<br>Bronchiectasis<br>Coalworker pneumoconiosis<br>Pneumoconiosis due to asbestos and other mineral fibres<br>Pneumoconiosis due to dust containing silica<br>Pneumoconiosis due to other inorganic dusts<br>Unspecified pneumoconiosis<br>Pneumoconiosis associated with tuberculosis<br>Airway disease due to specific organic dust<br>Hypersensitivity pneumonitis due to organic dust<br>Chronic respiratory conditions due to chemicals, gases, fumes and vapours<br>Chronic and other pulmonary manifestations due to radiation<br>Chronic drug-induced interstitial lung disorders | 5.9            |
| Hypothyroidism                                                        | E00<br>E01<br>E02<br>E03<br>E89.0                                                                                                                  | Congenital iodine-deficiency syndrome<br>Iodine-deficiency-related thyroid disorders and allied conditions<br>Subclinical iodine-deficiency hypothyroidism<br>Other hypothyroidism<br>Postprocedural hypothyroidism                                                                                                                                                                                                                                                                                                                                                                                                                                                                                                                                                                                                                                                                          | 4.5            |
| Cancer, non-metastatic (breast, cervical, colorectal, lung, prostate) | C18<br>C19<br>C20<br>C21<br>C33<br>C34<br>C38.4<br>C45.0<br>C46.7<br>C50<br>C53<br>C61<br>D01.0<br>D01.1<br>D01.2<br>D01.3<br>D02.2<br>D05         | Malignant neoplasm of colon<br>Malignant neoplasm of rectosigmoid junction<br>Malignant neoplasm of rectum<br>Malignant neoplasm of anus and anal canal<br>Malignant neoplasm of trachea<br>Malignant neoplasm of bronchus and lung<br>Pleura<br>Mesothelioma of pleura<br>Kaposi sarcoma of other sites<br>Malignant neoplasm of breast<br>Malignant neoplasm of cervix uteri<br>Malignant neoplasm of prostate<br>Carcinoma in situ of Colon<br>Carcinoma in situ of Rectosigmoid junction<br>Carcinoma in situ of Rectum<br>Carcinoma in situ of Anus and anal canal<br>Carcinoma in situ of Bronchus and lung<br>Carcinoma in situ of breast                                                                                                                                                                                                                                             | 4.2            |

| <b>Morbidity</b>      | <b>ICD-10 codes</b>                                                                                | <b>Description</b>                                                                                                                                                                                                                                                                                                                                                                                                                 | <b>Prevalence (%)</b> |
|-----------------------|----------------------------------------------------------------------------------------------------|------------------------------------------------------------------------------------------------------------------------------------------------------------------------------------------------------------------------------------------------------------------------------------------------------------------------------------------------------------------------------------------------------------------------------------|-----------------------|
|                       | D06<br>D07.5                                                                                       | Carcinoma in situ of cervix uteri<br>Carcinoma in situ of Prostate                                                                                                                                                                                                                                                                                                                                                                 |                       |
| Alcohol misuse        | E52<br>F10<br>G62.1<br>I42.6<br>K29.2<br>K70.0<br>K70.3<br>K70.9<br>T51<br>Z50.2<br>Z71.4<br>Z72.1 | Niacin deficiency<br>Mental and behavioural disorders due to use of alcohol<br>Alcoholic polyneuropathy<br>Alcoholic cardiomyopathy<br>Alcoholic gastritis<br>Alcoholic fatty liver<br>Alcoholic cirrhosis of liver<br>Alcoholic liver disease, unspecified<br>Toxic effect of alcohol<br>Alcohol rehabilitation<br>Alcohol abuse counselling and surveillance<br>Alcohol use                                                      | 4.1                   |
| Chronic heart failure | I09.9<br>I25.5<br>I42.0<br>I42.5<br>I42.6<br>I42.7<br>I42.8<br>I42.9<br>I43<br>I50                 | Rheumatic heart disease, unspecified<br>Ischaemic cardiomyopathy<br>Dilated cardiomyopathy<br>Other restrictive cardiomyopathy<br>Alcoholic cardiomyopathy<br>Cardiomyopathy due to drugs and other external agents<br>Other cardiomyopathies<br>Cardiomyopathy, unspecified<br>Cardiomyopathy in diseases classified elsewhere<br>Heart failure                                                                                   | 3.8                   |
| Severe constipation   | K55.8<br>K56.0<br>K56.4<br>K56.7<br>K59.0<br>K63.1<br>K63.4<br>K63.8<br>K92.8                      | Other vascular disorders of intestine<br>Paralytic ileus<br>Other impaction of intestine<br>Ileus, unspecified<br>Constipation<br>Perforation of intestine (nontraumatic)<br>Enteroptosis<br>Other specified diseases of intestine<br>Other specified diseases of digestive system                                                                                                                                                 | 3.3                   |
| Myocardial infarction | I21<br>I22                                                                                         | Acute myocardial infarction<br>Subsequent myocardial infarction                                                                                                                                                                                                                                                                                                                                                                    | 2.3                   |
| Depression            | F20.4<br>F31.3<br>F31.4<br>F31.5<br>F32<br>F33<br>F34.1<br>F41.2<br>F43.2                          | Post-schizophrenic depression<br>Bipolar affective disorder, current episode mild or moderate depression<br>Bipolar affective disorder, current episode severe depression without psychotic symptoms<br>Bipolar affective disorder, current episode severe depression with psychotic symptoms<br>Depressive episode<br>Recurrent depressive disorder<br>Dysthymia<br>Mixed anxiety and depressive disorder<br>Adjustment disorders | 2.3                   |

| <b>Morbidity</b>                     | <b>ICD-10 codes</b>                                                                            | <b>Description</b>                                                                                                                                                                                                                                                                                                                                                                                                                                    | <b>Prevalence (%)</b> |
|--------------------------------------|------------------------------------------------------------------------------------------------|-------------------------------------------------------------------------------------------------------------------------------------------------------------------------------------------------------------------------------------------------------------------------------------------------------------------------------------------------------------------------------------------------------------------------------------------------------|-----------------------|
| Stroke or transient ischaemic attack | G45.0<br>G45.1<br>G45.2<br>G45.3<br>G45.8<br><br>G45.9<br>H34.1<br>I60<br>I61<br>I63<br>I64    | Vertebro-basilar artery syndrome<br>Carotid artery syndrome (hemispheric)<br>Multiple and bilateral precerebral artery syndromes<br>Amaurosis fugax<br>Other transient cerebral ischaemic attacks and related syndromes<br>Transient cerebral ischaemic attack, unspecified<br>Central retinal artery occlusion<br>Subarachnoid haemorrhage<br>Intracerebral haemorrhage<br>Cerebral infarction<br>Stroke, not specified as haemorrhage or infarction | 2.0                   |
| Cancer, metastatic                   | C77<br><br>C78<br><br>C79<br><br>C80                                                           | Secondary and unspecified malignant neoplasm of lymph nodes<br><br>Secondary malignant neoplasm of respiratory and digestive organs<br><br>Secondary malignant neoplasm of other and unspecified sites<br><br>Malignant neoplasm, without specification of site                                                                                                                                                                                       | 1.8                   |
| Dementia                             | F00<br>F01<br>F02<br>F03<br>F05.1<br>G30<br>G31.1                                              | Dementia in Alzheimer disease<br>Vascular dementia<br>Dementia in other diseases classified elsewhere<br>Unspecified dementia<br>Delirium superimposed on dementia<br>Alzheimer disease<br>Senile degeneration of brain, not elsewhere classified                                                                                                                                                                                                     | 1.7                   |
| Rheumatoid arthritis                 | M05<br>M06<br>M31.5<br>M32<br>M33<br>M34<br>M35.1<br>M35.3<br>M36.0                            | Seropositive rheumatoid arthritis<br>Other rheumatoid arthritis<br>Giant cell arteritis with polymyalgia rheumatica<br>Systemic lupus erythematosus<br>Dermatopolymyositis<br>Systemic sclerosis<br>Other overlap syndromes<br>Polymyalgia rheumatica<br>Dermao(poly)myositis in neoplastic disease                                                                                                                                                   | 1.7                   |
| Epilepsy                             | G40<br>G41                                                                                     | Epilepsy<br>Status epilepticus                                                                                                                                                                                                                                                                                                                                                                                                                        | 1.4                   |
| Inflammatory bowel disease           | K50<br>K51                                                                                     | Crohn disease [regional enteritis]<br>Ulcerative colitis                                                                                                                                                                                                                                                                                                                                                                                              | 1.4                   |
| Cirrhosis and hepatic decompensation | K70.3<br>K74.3<br>K74.4<br>K74.5<br>K74.6<br>I85.0<br>I85.9<br>I98.2<br><br>I98.3<br><br>K65.0 | Alcoholic cirrhosis of liver<br>Primary biliary cirrhosis<br>Secondary biliary cirrhosis<br>Biliary cirrhosis, unspecified<br>Other and unspecified cirrhosis of liver<br>Oesophageal varices with bleeding<br>Oesophageal varices without bleeding<br>Oesophageal varices without bleeding in diseases classified elsewhere<br><br>Oesophageal varices with bleeding in diseases classified elsewhere<br><br>Acute peritonitis                       | 1.1                   |

| <b>Morbidity</b>                         | <b>ICD-10 codes</b>                                                                          | <b>Description</b>                                                                                                                                                                                                                                                                                                                                                                                                                                                                                                                                                                                                                                               | <b>Prevalence (%)</b> |
|------------------------------------------|----------------------------------------------------------------------------------------------|------------------------------------------------------------------------------------------------------------------------------------------------------------------------------------------------------------------------------------------------------------------------------------------------------------------------------------------------------------------------------------------------------------------------------------------------------------------------------------------------------------------------------------------------------------------------------------------------------------------------------------------------------------------|-----------------------|
|                                          | K65.8<br>K65.9<br>K67.0<br>K67.1<br>K67.2<br>K67.3<br>K67.8<br><br>K76.7<br>K93.0<br><br>R18 | Other peritonitis<br>Peritonitis, unspecified<br>Chlamydial peritonitis<br>Gonococcal peritonitis<br>Syphilitic peritonitis<br>Tuberculous peritonitis<br>Other disorders of peritoneum in infectious diseases classified elsewhere<br><br>Hepatorenal syndrome<br>Tuberculous disorders of intestines, peritoneum and mesenteric glands<br><br>Ascites                                                                                                                                                                                                                                                                                                          |                       |
| Cancer, lymphoma                         | C81<br>C82<br>C83<br>C84<br>C85<br><br>C88<br>C90.0<br>C90.2<br>C96                          | Hodgkin lymphoma<br>Follicular lymphoma<br>Non-follicular lymphoma<br>Mature T/NK-cell lymphomas<br>Other and unspecified types of non-Hodgkin lymphoma<br><br>Malignant immunoproliferative diseases<br>Multiple myeloma<br>Extramedullary plasmacytoma<br>Other leukaemias of specified cell type                                                                                                                                                                                                                                                                                                                                                              | 0.6                   |
| Peptic ulcer disease without haemorrhage | K25.7<br>K25.9<br><br>K26.7<br>K26.9<br><br>K27.7<br>K27.9<br><br>K28.7<br>K28.9             | Gastric ulcer-Chronic without haemorrhage or perforation<br>Gastric ulcer-Unspecified as acute or chronic, without haemorrhage or perforation<br><br>Duodenal ulcer-Chronic without haemorrhage or perforation<br>Duodenal ulcer-Unspecified as acute or chronic, without haemorrhage or perforation<br><br>Peptic ulcer, site unspecified- Chronic without haemorrhage or perforation<br>Peptic ulcer, site unspecified- Unspecified as acute or chronic, without haemorrhage or perforation<br><br>Gastrojejunal ulcer- Chronic without haemorrhage or perforation<br>Gastrojejunal ulcer- Unspecified as acute or chronic, without haemorrhage or perforation | 0.6                   |
| Irritable bowel syndrome                 | K58                                                                                          | Irritable bowel syndrome                                                                                                                                                                                                                                                                                                                                                                                                                                                                                                                                                                                                                                         | 0.5                   |
| Multiple sclerosis                       | G35<br>G36<br>G37<br><br>H46                                                                 | Multiple sclerosis<br>Other acute disseminated demyelination<br>Other demyelinating diseases of central nervous system<br><br>Optic neuritis                                                                                                                                                                                                                                                                                                                                                                                                                                                                                                                     | 0.5                   |
| Parkinson's disease                      | G20<br>G21<br>G22                                                                            | Parkinson disease<br>Secondary parkinsonism<br>Parkinsonism in diseases classified elsewhere                                                                                                                                                                                                                                                                                                                                                                                                                                                                                                                                                                     | 0.5                   |
| Schizophrenia                            | F20<br>F21<br>F23.2<br>F25                                                                   | Schizophrenia<br>Schizotypal disorder<br>Acute schizophrenia-like psychotic disorder<br>Schizoaffective disorders                                                                                                                                                                                                                                                                                                                                                                                                                                                                                                                                                | 0.3                   |

| <b>Morbidity</b>            | <b>ICD-10 codes</b>                                         | <b>Description</b>                                                                                                                                                                    | <b>Prevalence (%)</b> |
|-----------------------------|-------------------------------------------------------------|---------------------------------------------------------------------------------------------------------------------------------------------------------------------------------------|-----------------------|
| Psoriasis                   | L40.0<br>L40.1<br>L40.2<br>L40.3<br>L40.4<br>L40.8<br>L40.9 | Psoriasis vulgaris<br>Generalized pustular psoriasis<br>Acrodermatitis continua<br>Pustulosis palmaris et plantaris<br>Guttate psoriasis<br>Other psoriasis<br>Psoriasis, unspecified | 0.2                   |
| Peripheral vascular disease | I70.2                                                       | Atherosclerosis of arteries of extremities                                                                                                                                            | 0.1                   |
| Chronic viral hepatitis B   | B16<br>B18.0<br>B18.1                                       | Acute hepatitis B<br>Chronic viral hepatitis B with delta-agent<br>Chronic viral hepatitis B without delta-agent                                                                      | 0.0                   |

Notes: Minor changes to the Tonelli et al. (2015) published algorithms were made. The algorithms developed by Tonelli required a combination of hospitalization, claims and outpatient codes over varying time periods. We modified this to at least one hospitalisation in the five years prior to index for all morbidities. For identifying chronic kidney disease, Tonelli supplemented the algorithm using lab data, however we only used administrative data. The codes for "peptic ulcer disease" referred to "peptic ulcer disease without haemorrhage or perforation", therefore we amended the morbidity description. As specific codes for atrial fibrillation were only implemented in Scotland from April 2016 (ICD-10 version 2016), we included "atrial fibrillation and flutter" (ICD-10 code I48). No entry in ICD-10 was identified for: C46.71 (replaced with C46.7); M25.50, M25.51, M25.55, M25.57 (replaced with M25.5); K63.81 and K63.88 (replaced with K63.8), K92.80 and K92.88 (replaced with K92.8).
