# Supplementary material for: Measuring multimorbidity in hospitalised patients using linked hospital episode data: comparison of two measures
Source: PubMed Central journal article supplement (PMC7479941; doi:10.23889/ijpds.v4i1.461), 2019-01-21
Supplement: ijpds-04-461-s002.pdf [file ijpds-04-461-s002.pdf]

## Supplementary Appendix 2. Characteristics of patients with missing CHI numbers, SIMD quintile or UR category

### Admissions with missing CHI numbers, adults with an inpatient stay 2014

Records with missing CHI numbers had a higher proportion of males and younger age than our final population.

#### Age-sex distribution of admissions with missing CHI numbers

| Age          | Female     | Male       | Total      |
|--------------|------------|------------|------------|
| 18-20        | 8          | 17         | <b>25</b>  |
| 21-30        | 33         | 111        | <b>144</b> |
| 31-40        | 17         | 86         | <b>103</b> |
| 41-50        | 29         | 88         | <b>117</b> |
| 51-60        | 18         | 84         | <b>102</b> |
| 61-70        | 30         | 47         | <b>77</b>  |
| 71-80        | 33         | 29         | <b>62</b>  |
| ≥81          | 19         | 13         | <b>32</b>  |
| <b>Total</b> | <b>187</b> | <b>475</b> | <b>662</b> |

#### Patients with missing SIMD quintile and UR category

| Characteristic               | SIMD       |         | UR         |         |
|------------------------------|------------|---------|------------|---------|
|                              | missing    |         | missing    |         |
|                              | n          | %       | n          | %       |
| <b>Total</b>                 | <b>314</b> |         | <b>576</b> |         |
| <b>Males, n (%)</b>          | 155        | (49.4)  | 258        | (44.8)  |
| <b>Age, median (IQR)</b>     | 47         | (31-62) | 43         | (29-60) |
| <b>Admission type, n (%)</b> |            |         |            |         |
| <b>Routine</b>               | 82         | (26.1)  | 156        | (27.1)  |
| <b>Emergency</b>             | 232        | (73.9)  | 420        | (72.9)  |
